# Supplementary material for: Clonal dynamics following p53 loss of heterozygosity in Kras-driven cancers
Source: PubMed Central journal article supplement (PMC5025814; doi:10.1038/ncomms12685), 2016-09-02
Supplement: ncomms12685-s1.pdf [file ncomms12685-s1.pdf]

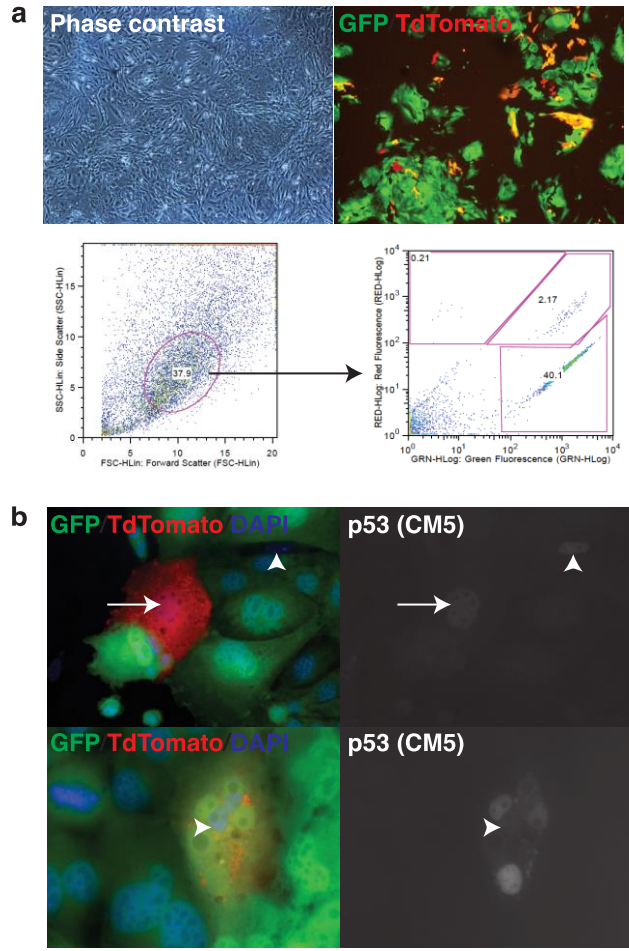

Supplementary Figure 1

1  
2  
3  
4  
5  
6  
7  
8  
9  
10

**Supplementary Figure 1. Induction of p53 LOH by MADM.**

a) Primary cultures derived from the pancreas of an 11-week-old *Pdx1-Cre; K-MADM-p53* mouse revealed increased  $p53^{KO/KO}$  (green, GFP+/tdTomato-) cells compared to  $p53^{WT/WT}$  (red, GFP-/tdTomato+) and  $p53^{KO/WT}$  (yellow, GFP+/tdTomato+) cells by fluorescence microscopy and FACS. FACS plots show GFP fluorescence on x-axis and tdTomato fluorescence on y-axis.

b) Immunofluorescence staining of cells from (a) confirms nuclear p53 expression in red (arrow), yellow (horizontal arrowhead), and colorless (vertical arrowhead) cells, but not green cells.

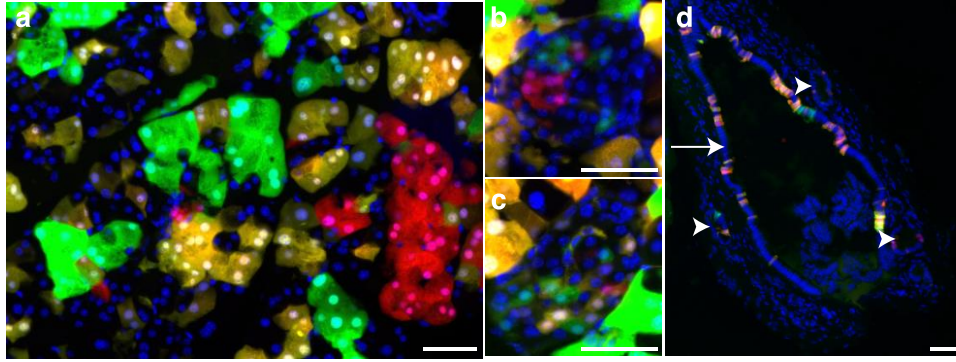

**Supplementary Figure 2**

11

12 **Supplementary Figure 2. *Pdx1-Cre* induces MADM labeling in multiple pancreatic cell**

13 **types.**

14 a) Pancreas from a 6-month-old *Pdx1-Cre; K-MADM-p53* mouse contained  $p53^{KO/KO}$  (green,  
 15 GFP+/tdTomato-),  $p53^{WT/WT}$  (red, GFP-/tdTomato+), and  $p53^{KO/WT}$  (yellow,  
 16 GFP+/tdTomato+) acinar cells with normal appearance.

17 b) Pancreatic islet harboring green and red cells.

18 c) Pancreatic islet harboring green, red, and yellow cells.

19 d) Large pancreatic duct (arrow) and smaller nearby ducts (arrowheads) harboring green, red,  
 20 and yellow cells. Blue = DAPI-stained nuclei. All scale bars are 50  $\mu\text{m}$ .

21

22

23

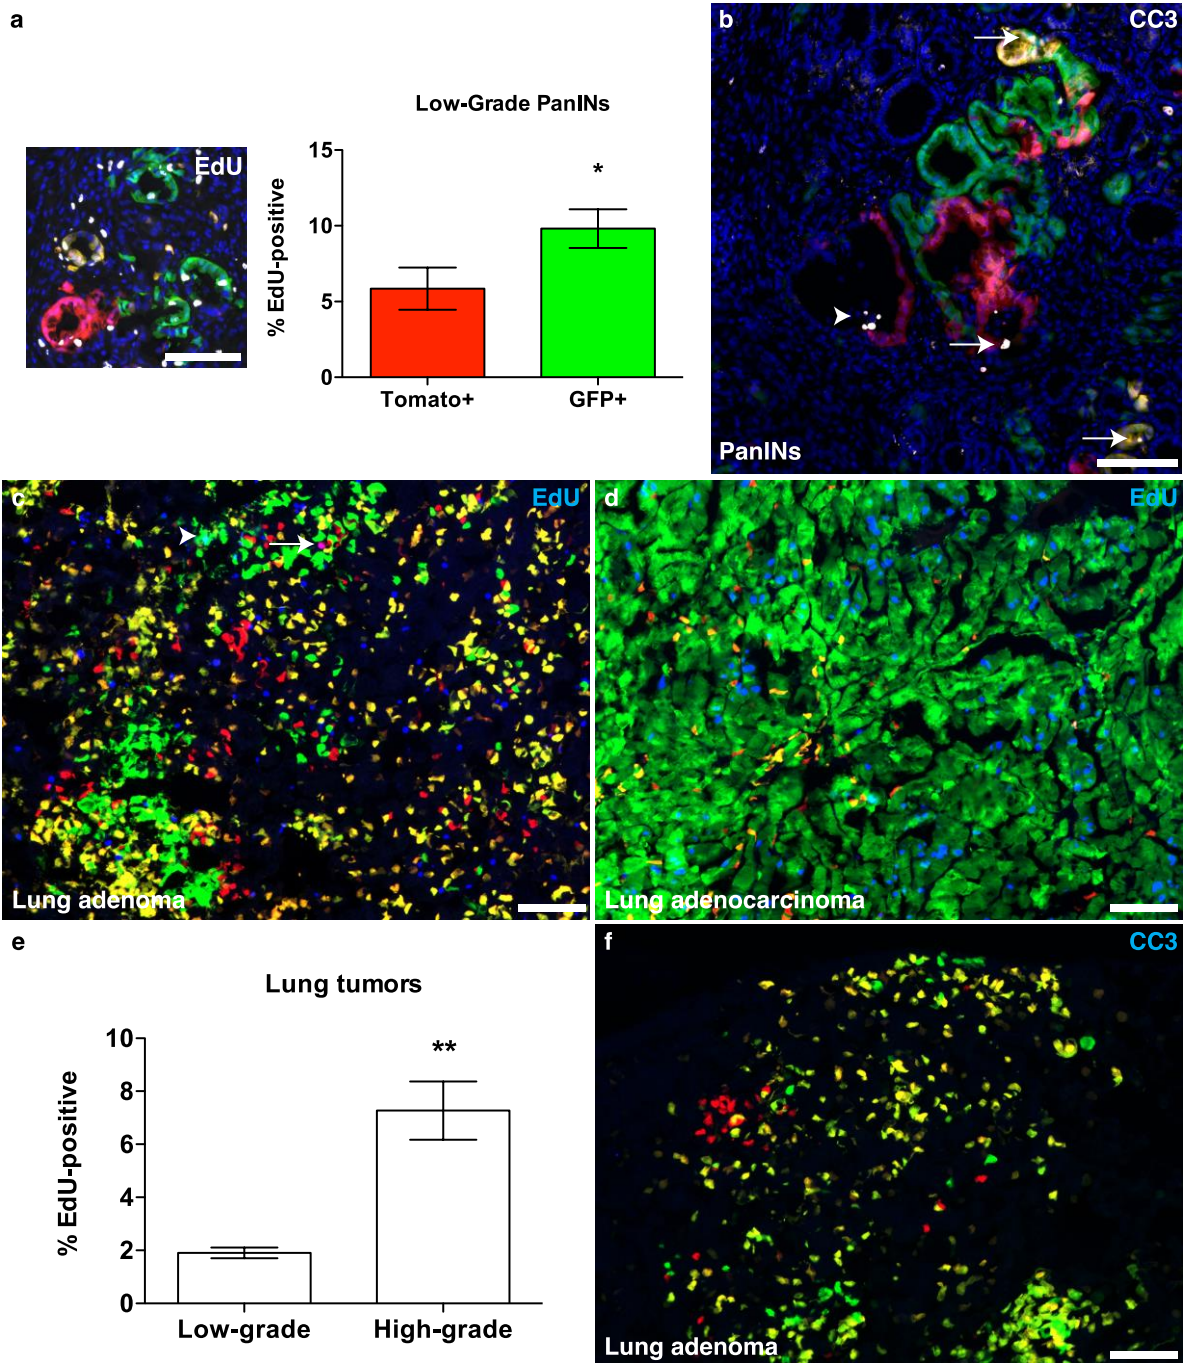

Supplementary Figure 3

24  
 25 **Supplementary Figure 3. Analysis of proliferation and apoptosis in pancreatic and lung**  
 26 **tumors.**

27 a) Representative image and quantitation of EdU immunostaining (white) in low-grade PanINs  
 28 from *Pdx1-Cre; K-MADM-p53* mice. Shown are the percentages of EdU-positive cells co-

29 labelled with Tomato or GFP (average +/- s.e.m of n=31 low-power fields from n=2 mice).  
30 \*p<0.05, two-tailed student's t-test. Blue = DAPI-stained nuclei.

31 b) Cleaved caspase-3 (CC3) immunostaining (white) of low-grade PanINs reveals rare apoptotic  
32  $p53^{KO/KO}$  (green, GFP+/tdTomato-)  $p53^{WT/WT}$  (red, GFP-/tdTomato+) and  $p53^{KO/WT}$  (yellow,  
33 GFP+/tdTomato+) cells (arrows). Most apoptotic cells were found within PanIN lumens  
34 (arrowhead). No difference in apoptotic frequency based on  $p53$  genotype was observed.  
35 Blue = DAPI-stained nuclei.

36 c) EdU immunostaining (blue) of low-grade lung adenoma reveals few co-labelled  $p53^{KO/KO}$   
37 (arrowhead) and  $p53^{WT/WT}$  (arrow) cells.

38 d) EdU immunostaining (blue) of lung adenocarcinoma reveals a many EdU-positive  $p53^{KO/KO}$   
39 cells.

40 e) Quantitation of the percentage of EdU-positive cells in lung tumors. Shown are average  
41 percentage +/- s.e.m. (n=28 low-grade adenomas and n=8 low-power fields of high-grade  
42 adenomas from n=3 mice). \*\*p<0.01, two-tailed student's t-test.

43 f) CC3 immunostaining (blue) of low-grade lung adenoma reveals no apoptotic cells.

44 All scale bars are 100  $\mu$ m.

45  
46  
47  
48  
49  
50  
51

52 **Supplementary Table 1. Genotyping primers**

|                                       |                                            |
|---------------------------------------|--------------------------------------------|
| <b><i>MADM11</i></b>                  |                                            |
| Primer 1                              | TGG AGG AGG ACA AAC TGG TCA C              |
| Primer 2                              | TTC CCT TTC TGC TTC ATC TTG C              |
| Primer 3                              | TCA ATG GGC GGG GGT CGT T                  |
|                                       |                                            |
| <b><i>Cre</i></b>                     |                                            |
| Primer 1                              | CAC CCT GTT ACG TAT AGC CG                 |
| Primer 2                              | GAG TCA TCC TTA GCG CCG TA                 |
| Primer 3                              | CCT TGA GGC TGT CCA AGT GAT TCA GGC CAT CG |
| Primer 4                              | CCA ATC TGC TCA CAC AGG ATA GAG AGG GCA GG |
|                                       |                                            |
| <b><i>Kras<sup>G12D</sup></i></b>     |                                            |
| Primer 1                              | GTC TTT CCC CAG CAC AGT GC                 |
| Primer 2                              | CTC TTG CCT ACG CCA CCA GCT C              |
| Primer 3                              | AGC TAG CCA CCA TGG CTT GAG TAA GTC TGC A  |
|                                       |                                            |
| <b><i>Kras<sup>LA2</sup></i></b>      |                                            |
| Primer 1                              | TGC ACA GCT TAG TGA GAC CC                 |
| Primer 2                              | GGA GCA AAG CTG CTA TTG GC                 |
| Primer 3                              | GAC TGC TCT CTT TCA CCT CC                 |
|                                       |                                            |
| <b><i>p53<sup>KO/WT</sup></i></b>     |                                            |
| Primer 1                              | ACC GCT ATC AGG ACA TAG CGT TGG            |
| Primer 2                              | CAC AGC GTG GTG GTA CCT TAT G              |
| Primer 3                              | GGT ATA CTC AGA GCC GGC CTG                |
|                                       |                                            |
| <b><i>p53<sup>flox</sup></i></b>      |                                            |
| Primer 1                              | CAC AAA AAC AAG TTA AAC CCA G              |
| Primer 2                              | AGC ACA TAG GAG GCA GAG AC                 |
|                                       |                                            |
| <b><i>LSL-p53<sup>R172H</sup></i></b> |                                            |
| Primer 1                              | CTT GGA GAC ATA GCC ACA CTG                |
| Primer 2                              | AGC TAG CCA CCA TGG CTT GAG TAA GT         |
| Primer 3                              | CAA CTG TTC TAC CTC AAG AGC C              |

53

54

55

56

57 **Supplementary Table 2. Genotyping protocols**

| Protocol           | Temperature                                         | <i>MADM11</i> | <i>Cre</i> | <i>Kras</i> <sup>G12D</sup> | <i>Kras</i> <sup>LA2</sup> | <i>p53</i> <sup>KO/WT</sup> | <i>p53</i> <sup>fllox</sup> | <i>LSL-p53</i> <sup>R172H</sup> |
|--------------------|-----------------------------------------------------|---------------|------------|-----------------------------|----------------------------|-----------------------------|-----------------------------|---------------------------------|
| Step 1             | 94C                                                 | 3:00          | 3:00       | 3:00                        | 3:00                       | 3:00                        | 3:00                        | 3:00                            |
| Step 2             | 94C                                                 | 0:15          | 0:15       | 0:30                        | 0:30                       | 0:30                        | 0:30                        | 0:30                            |
| Step 3             | 58C<br>( <i>MADM11/Cre</i> )<br>60C<br>(all others) | 0:25          | 0:25       | 1:30                        | 1:30                       | 1:30                        | 1:30                        | 1:30                            |
| Step 4             | 72C                                                 | 0:45          | 0:45       | 1:00                        | 1:00                       | 1:00                        | 1:00                        | 1:00                            |
| Step 2-4<br>Cycles |                                                     | 32            | 32         | 34                          | 34                         | 34                          | 34                          | 34                              |
| Step 5             | 72C                                                 | 5:00          | 5:00       | 5:00                        | 5:00                       | 5:00                        | 5:00                        | 5:00                            |
| Step 6             | 4C                                                  | forever       | forever    | forever                     | forever                    | forever                     | forever                     | forever                         |
| Expected           | WT                                                  | 350 bp        | 500 bp     | 650 bp                      | 220 bp                     | 450 bp                      | 288 bp                      | 364 bp                          |
| Band<br>Sizes      | Mutant                                              | 230 bp        | 300 bp     | 500 bp                      | 390 bp                     | 700 bp                      | 370 bp                      | 278 bp                          |

**Notes**

1. Step times are listed as m:ss.
2. WT *MADM11* band corresponds to endogenous *Hipp11* locus lacking either *MADM11* allele.
3. Mutant *MADM11* band corresponds to either *MADM11-TG* and *MADM11-GT* alleles.
4. *Cre* primers are universal (detect *Pdx1-Cre* and *Rosa26-Cre*<sup>ERT2</sup> transgenes).
5. WT *Cre* band corresponds to beta-globin control
